# Supplementary material for: Switchable supramolecular assemblies on graphene
Source: Royal Society of Chemistry journal article supplement (doi:10.1039/c4nr01796j), 2014-01-01
Supplement: c4nr01796j1.pdf [file c4nr01796j1.pdf]

## SUPPLEMENTARY INFORMATION

# Switchable Supramolecular Assemblies on Graphene

Qiaoyu Zhou<sup>a, ‡</sup>, Yibao Li<sup>b, ‡</sup>, Qiang Li<sup>a</sup>, Yibing Wang<sup>a</sup>, Yanlian Yang<sup>a</sup>, Ying Fang<sup>a,\*</sup> and Chen Wang<sup>a,\*</sup>

<sup>a</sup> National Center for Nanoscience and Technology, China, 11 Beiyitiao Street, Zhongguancun, Beijing 100190, P.R.China

<sup>b</sup> Key Laboratory of Organo-pharmaceutical Chemistry, Gannan Normal University, Ganzhou 341000, P. R. China.

**This file includes:**

Supplementary Fig. S1 to S4

## Supplementary Figures

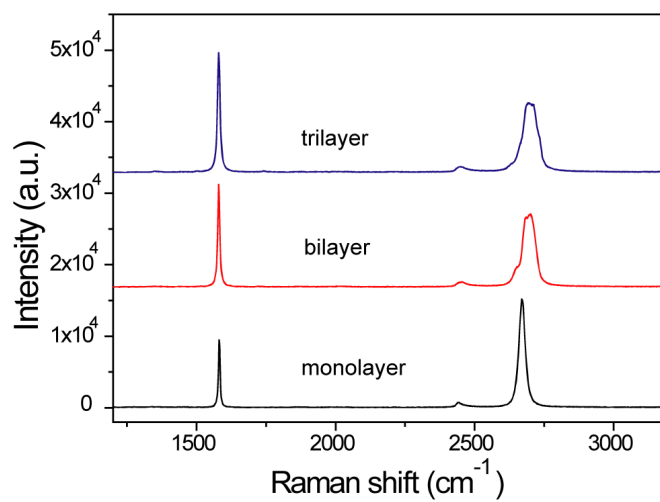

**Fig. S1** Raman spectra of single-, bi- and tri-layer graphene sheets, respectively.

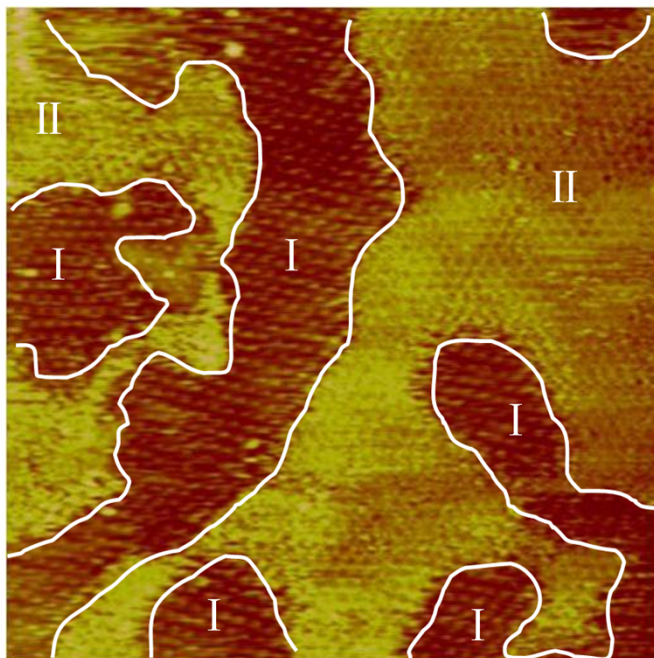

**Fig. S2** A large-scale STM image ( $182.9 \text{ nm} \times 182.9 \text{ nm}$ ) of the self-assembled TMA at the 1-octanoic acid/bilayers graphene interface.

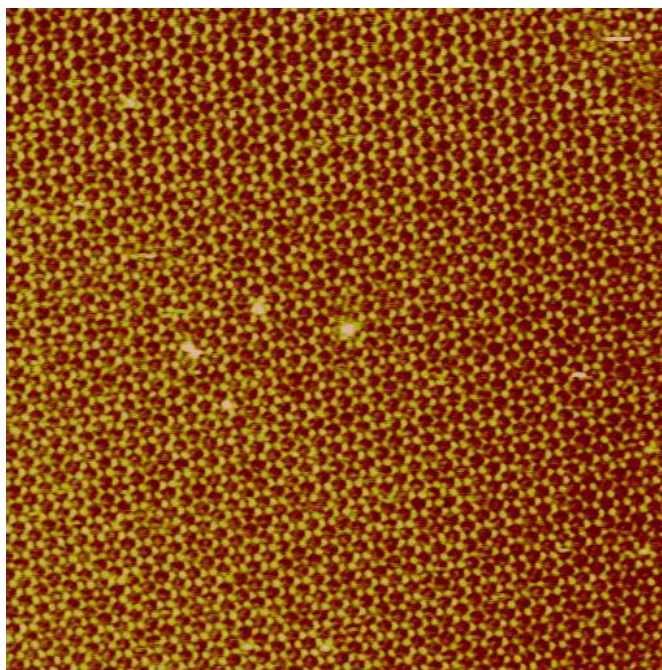

**Fig. S3** A large-scale STM image ( $182.9 \text{ nm} \times 182.9 \text{ nm}$ ) of the self-assembled TMA at the 1-octanoic acid/graphite interface.

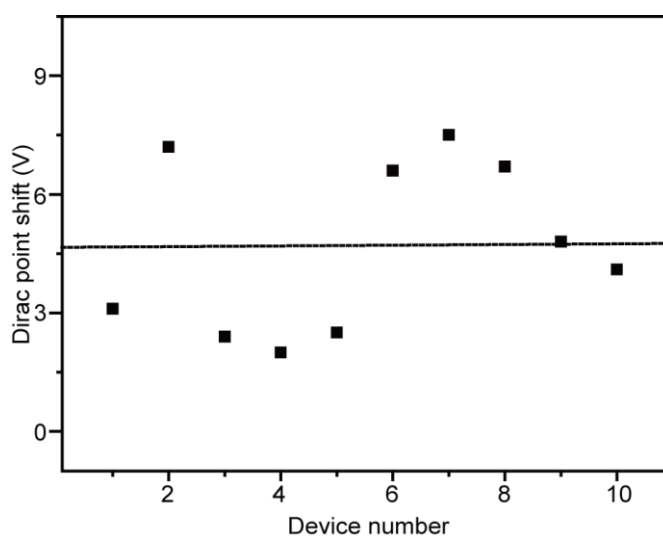

**Fig. S4** Dirac point shift of 10 single-layer graphene transistors after the adsorption of TMA adlayers.
